# Supplementary material
Source: publisher site journal article supplement (https://www.dovepress.com/article/230934)

Supplementary Appendix 1. LIBERTY 360 Participating Institutions

LIBERTY 360 Participating Institutions

1. Metro Health Hospital, Wyoming, MI
2. Coastal Vascular and Interventional, Pensacola, FL
3. Mid-Michigan Heart and Vascular Center, P.C., Mt. Pleasant, MI
4. Rex Hospital, Raleigh, NC
5. St. Luke's Medical Center, Phoenix, AZ
6. Gotham Cardiovascular Research, PC, New York, NY
7. Mission Research Institute, New Braunfels, TX
8. Arkansas Heart Hospital Clinic, Little Rock, AR
9. El Paso Cardiology Associates, El Paso, TX
10. Mercy Gilbert Medical Center, Chandler, AZ
11. First Coast Cardiovascular Institute, Jacksonville, FL
12. St. John Hospital and Medical Center, Detroit, MI
13. Duke University Hospital, Lumberton, NC
14. Houston Methodist Sugar Land Hospital, Sugar Land, TX
15. KentuckyOne Health, Lexington, KY
16. Premier Surgical Associates, Knoxville, TN
17. San Antonio Endovascular & Heart Institute, San Antonio, TX
18. Midwest Cardiovascular Research Foundation, Davenport, IA
19. Riverside Methodist Hospital/Ohio Health, Columbus, OH
20. Cardiovascular Associates of East Texas, Tyler, TX
21. Memorial Hospital of Carbondale, Carbondale, IL
22. Colorado Heart and Vascular, Lakewood, CO
23. University Surgical Associates, Chattanooga, TN
24. Columbia University Medical Center, New York, NY
25. VA Eastern Colorado Health Care System-Denver VAMC, Denver, CO
26. Michigan Outpatient Vascular Institute, Dearborn, MI
27. Cardiothoracic and Vascular Surgeons/CTVS, Austin, TX
28. Shady Grove Adventist Hospital, Rockville, MD
29. Lester E. Cox Medical Centers, Springfield, MO
30. Baptist Memorial Hospital – DeSoto, Southaven, MS
31. Wellmont CVA Heart Institute, Kingsport, TN
32. Clearwater Cardiovascular & Interventional Consultants, Clearwater, FL
33. Baptist Cardiac and Vascular Institute, Miami, FL
34. Providence Health Center, Waco, TX
35. The Heart Institute at Largo, Largo, FL
36. Hartford Hospital, Hartford, CT
37. Yale-New Haven Hospital, New Haven, CT
38. Saint Luke's Hospital, Kansas City, MO
39. Sanford Research, Sioux Falls, SD
40. Mount Sinai Medical Center Heart Institute – Miami, Miami Beach, FL
41. Radiology and Imaging Specialists of Lakeland, P.A., Lakeland, FL
42. University of Texas Medical Branch at Galveston, Galveston, TX
43. Florida Hospital Tampa, Pepin Heart Institute, Tampa, FL
44. Florida Hospital, Orlando, FL
45. St. John’s Hospital Springfield, Springfield, IL
46. Metropolitan Heart Institute, Coon Rapids, MN
47. Houston Methodist Hospital Research Institute, Houston, TX
48. St. John Health System, Tulsa, OK
49. Chicago Vascular Clinic, Schaumburg, IL
50. Phoenix Heart Cardiovascular Lab, Glendale, AZ
51. Cedars-Sinai Heart Institute, Los Angeles, CA

**Supplementary Table 1. Procedural parameters and angiographic complications (Core Lab reported).**

|  | **Rutherford 5-6** |
| --- | --- |
| Lesion location within leg | N=558 |
| ATK only | 132 (23.7) |
| ATK and BTK | 62 (11.1) |
| BTK only | 363 (65.1) |
| Unknown | 1 (0.2) |
| Target lesion length | N=524 |
| <40 mm | 141 (26.9) |
| 40 – 99 mm | 139 (26.5) |
| ≥100 mm | 244 (46.6) |
| Chronic total occlusions | 233/547 (42.6) |
| TASC lesion type | N=536 |
| A | 253 (47.2) |
| B | 103 (19.2) |
| C | 94 (17.5) |
| D | 86 (16.0) |
| Predominant calcified plaque morphology | 314/525 (59.8) |
| PARC degree of calcification | N=282 |
| Focal | 35 (12.4) |
| Mild | 39 (13.8) |
| Moderate | 70 (24.8) |
| Severe | 138 (48.9) |
| Minimal lumen diameter (mm) |  |
| Pre-procedure | 0.5 ± 0.7  0.3 [0.0, 0.9]  (N=545) |
| Post-procedure final | 2.2 ± 1.2  2.0 [1.4, 3.0] (N=531) |
| Target lesion % stenosis |  |
| Pre-procedure | 83.5 ± 18.4  89.0 [70.0, 100.0] (N=547) |
| Post-procedure final | 33.9 ± 21.0  31.0 [21.0, 42.0] (N=531) |
| Lesion success | 429/533 (80.5) |
| <50% residual stenosis for target lesion | 468/535 (87.5) |
| Severe angiographic complications | 51/552 (9.2) |
| Severe dissection | 16/557 (2.9) |
| Perforation | 6/557 (1.1) |
| Abrupt closure | 6/557 (1.1) |
| Distal embolization | 25/552 (4.5) |
| Data provided as mean ± standard deviation/median [IQR] or number (percentage) as appropriate.  ATK = above-the-knee; BTK = below-the-knee; PARC = Peripheral Academic Research Consortium; TASC = Trans-Atlantic Inter-Society Consensus. | |

**Supplementary Figure 1.** Change in Rutherford classification (RC) over time. Percentage of patients within each Rutherford classification over time as recorded at each follow-up visit. Patient number in parenthesis at each time point.


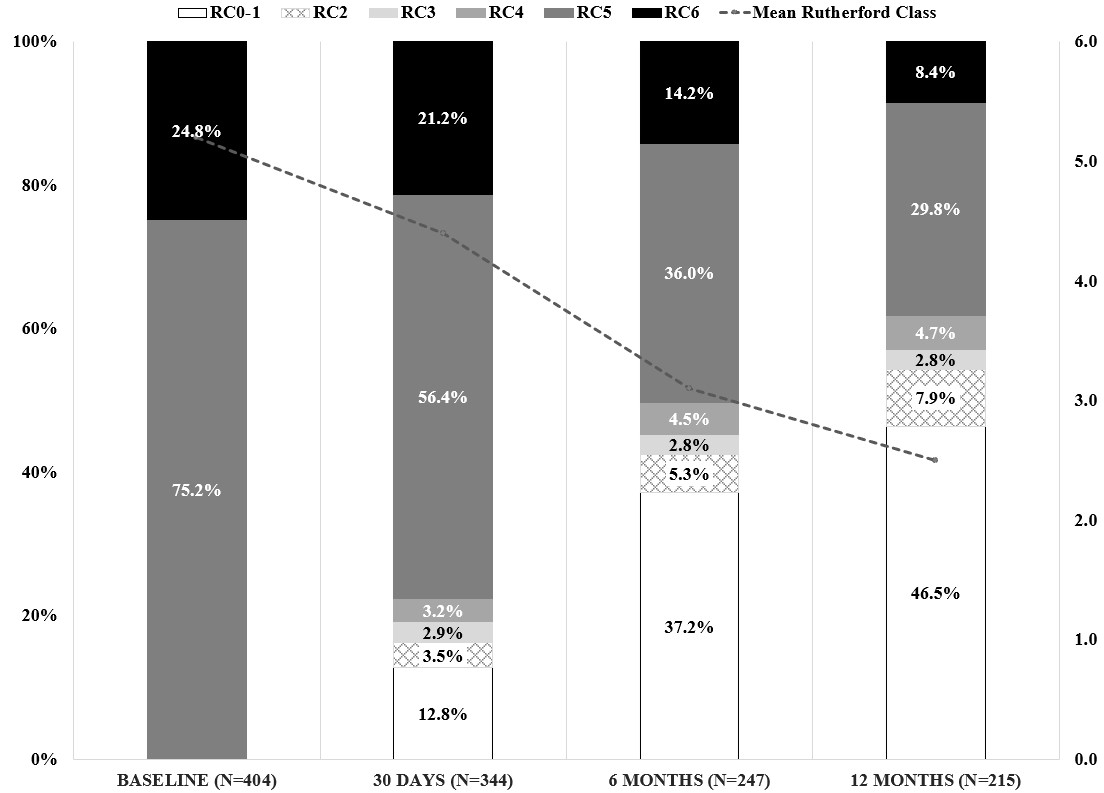

Supplement: Supplementary file 1 [file get_supplementary_file.php]
